# Supplementary material for: Estimation of the Genome Size and Complete Chloroplast Genome in Adenophora remotiflora: Genome Structures, Comparative Genomics, and Phylogenetic Diversity
Source: MDPI journal article supplement (doi:10.3390/app14010275), 2023-12-28
Supplement: s1 [file s1]

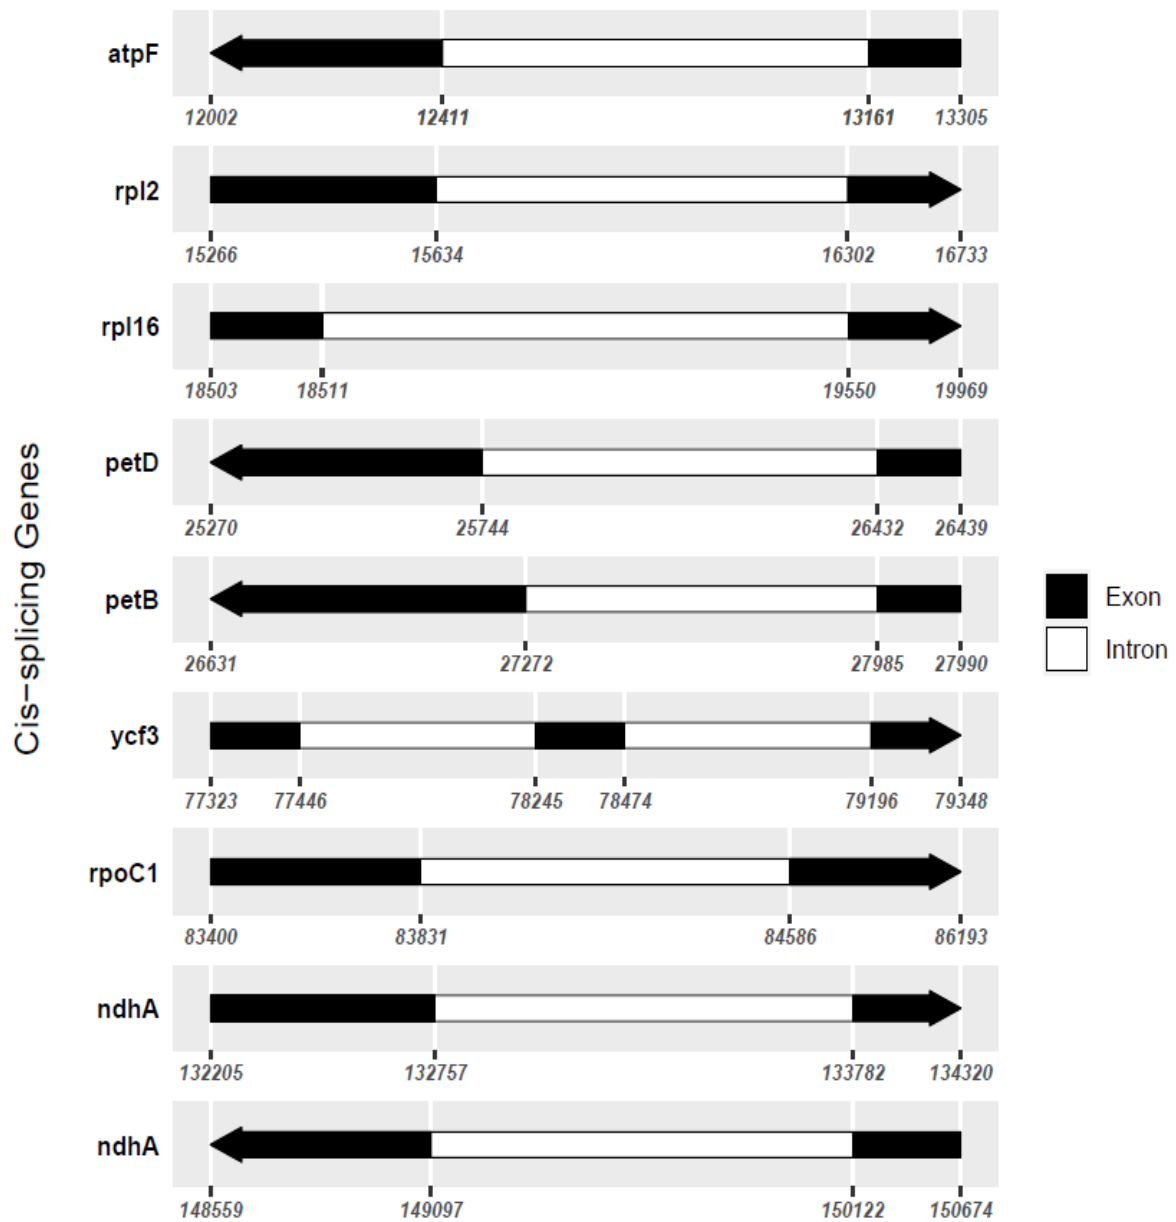

**Supplementary Figure S1.** Schematic of the eight *cis*-splicing genes in the *A. remotiflora* chloroplast genome. The genes are arranged from top to bottom on the *A. remotiflora* chloroplast genome, and arrows indicate the sense direction of the gene. The gene structures showed that exon regions are displayed in black color box while introns are indicated in white.

**Supplementary Table S1.** Characteristics of simple sequence repeats in *A. remotiflora*.

| Number | Type | Structure | Size(bp) | Start  | End    |
|--------|------|-----------|----------|--------|--------|
| 1      | p2   | (AT)6     | 12       | 15094  | 15105  |
| 2      | p1   | (G)10     | 10       | 28936  | 28945  |
| 3      | p1   | (T)12     | 12       | 31027  | 31038  |
| 4      | p1   | (T)14     | 14       | 53820  | 53833  |
| 5      | p1   | (G)10     | 10       | 56946  | 56955  |
| 6      | p1   | (T)10     | 10       | 63516  | 63525  |
| 7      | p1   | (T)10     | 10       | 73299  | 73308  |
| 8      | p1   | (T)10     | 10       | 74248  | 74257  |
| 9      | p1   | (T)11     | 11       | 79394  | 79404  |
| 10     | p2   | (TA)6     | 12       | 86102  | 86113  |
| 11     | p1   | (A)11     | 11       | 88518  | 88528  |
| 12     | p1   | (T)10     | 10       | 90736  | 90745  |
| 13     | p1   | (T)10     | 10       | 99924  | 99933  |
| 14     | p3   | (AAT)5    | 15       | 100812 | 100826 |
| 15     | p1   | (A)10     | 10       | 104232 | 104241 |
| 16     | p1   | (T)10     | 10       | 120770 | 120779 |
| 17     | p1   | (A)10     | 10       | 124219 | 124228 |
| 18     | p1   | (A)13     | 13       | 124626 | 124638 |
| 19     | p1   | (A)12     | 12       | 128260 | 128271 |
| 20     | p1   | (A)10     | 10       | 133366 | 133375 |
| 21     | p1   | (T)10     | 10       | 149504 | 149513 |
| 22     | p1   | (T)12     | 12       | 154608 | 154619 |
| 23     | p1   | (T)13     | 13       | 158241 | 158253 |
| 24     | p1   | (T)10     | 10       | 158651 | 158660 |
| 25     | p1   | (A)10     | 10       | 162100 | 162109 |

**Supplementary Table S2.** Characteristics of the dispersed repeats in *A. remotiflora*.

| First length | First start | Repeat<br>type <sup>1)</sup> | Second length | Second start | Interval<br>Distance | E-value   |
|--------------|-------------|------------------------------|---------------|--------------|----------------------|-----------|
| 593          | 30318       | D                            | 593           | 117558       | -3                   | 0.00E+00  |
| 593          | 30318       | P                            | 593           | 164727       | -3                   | 0.00E+00  |
| 527          | 98569       | D                            | 527           | 121135       | 0                    | 0.00E+00  |
| 527          | 98569       | P                            | 527           | 161216       | 0                    | 0.00E+00  |
| 511          | 34849       | P                            | 511           | 139127       | -1                   | 0.00E+00  |
| 483          | 30547       | D                            | 483           | 117787       | -3                   | 6.92E-273 |
| 483          | 30547       | P                            | 483           | 164608       | -3                   | 6.92E-273 |
| 450          | 115032      | D                            | 450           | 129865       | -2                   | 9.21E-256 |
| 450          | 115032      | P                            | 450           | 152563       | -2                   | 9.21E-256 |
| 450          | 129865      | P                            | 450           | 167396       | -2                   | 9.21E-256 |
| 450          | 152563      | D                            | 450           | 167396       | -2                   | 9.21E-256 |
| 441          | 152572      | D                            | 441           | 167405       | -1                   | 3.51E-253 |
| 374          | 98208       | D                            | 374           | 120770       | -1                   | 6.49E-213 |
| 374          | 98208       | P                            | 374           | 161734       | -1                   | 6.49E-213 |
| 343          | 99924       | D                            | 343           | 100332       | -1                   | 2.74E-194 |
| 347          | 98061       | D                            | 347           | 121063       | -3                   | 1.94E-191 |
| 347          | 98061       | P                            | 347           | 161468       | -3                   | 1.94E-191 |
| 323          | 98325       | D                            | 323           | 121772       | 0                    | 2.93E-185 |
| 323          | 98325       | P                            | 323           | 160783       | 0                    | 2.93E-185 |
| 310          | 37181       | P                            | 310           | 43274        | -3                   | 2.61E-169 |
| 302          | 37070       | P                            | 302           | 43393        | -3                   | 1.58E-164 |
| 292          | 44458       | P                            | 292           | 56411        | -2                   | 5.17E-161 |
| 283          | 44467       | P                            | 283           | 56411        | -1                   | 3.01E-158 |
| 281          | 102362      | D                            | 281           | 102641       | -3                   | 5.60E-152 |
| 275          | 98133       | D                            | 275           | 98569        | -3                   | 2.15E-148 |
| 257          | 120887      | D                            | 257           | 121772       | -1                   | 1.23E-142 |
| 257          | 120887      | P                            | 257           | 160849       | -1                   | 1.23E-142 |
| 257          | 121772      | P                            | 257           | 161734       | -1                   | 1.23E-142 |
| 257          | 160849      | D                            | 257           | 161734       | -1                   | 1.23E-142 |
| 254          | 30776       | D                            | 254           | 118016       | -2                   | 2.95E-138 |
| 254          | 30776       | P                            | 254           | 164608       | -2                   | 2.95E-138 |
| 256          | 98027       | D                            | 256           | 121029       | -3                   | 4.76E-137 |
| 256          | 98027       | P                            | 256           | 161593       | -3                   | 4.76E-137 |
| 245          | 30785       | D                            | 245           | 118025       | -1                   | 1.97E-135 |
| 245          | 30785       | P                            | 245           | 164608       | -1                   | 1.97E-135 |

|     |        |   |     |        |    |           |
|-----|--------|---|-----|--------|----|-----------|
| 242 | 97766  | D | 242 | 97847  | -3 | 1.08E-128 |
| 236 | 23807  | D | 236 | 141531 | -3 | 4.10E-125 |
| 231 | 23586  | D | 231 | 141310 | -3 | 3.94E-122 |
| 229 | 98217  | D | 229 | 98653  | -3 | 6.13E-121 |
| 229 | 98217  | D | 229 | 121219 | -3 | 6.13E-121 |
| 229 | 98217  | P | 229 | 161430 | -3 | 6.13E-121 |
| 229 | 98653  | D | 229 | 120779 | -3 | 6.13E-121 |
| 229 | 98653  | P | 229 | 161870 | -3 | 6.13E-121 |
| 229 | 120779 | D | 229 | 121219 | -3 | 6.13E-121 |
| 229 | 120779 | P | 229 | 161430 | -3 | 6.13E-121 |
| 229 | 121219 | P | 229 | 161870 | -3 | 6.13E-121 |
| 229 | 161430 | D | 229 | 161870 | -3 | 6.13E-121 |
| 225 | 23818  | D | 225 | 141542 | -2 | 6.68E-121 |
| 224 | 23894  | D | 224 | 141618 | -3 | 5.88E-118 |

\* <sup>1)</sup> Repeat type (D: direct matches; P: palindromic matches)

**Supplementary Table S3.** Characteristics of the tandem repeats in *A. remotiflora*.

| Start  | End    | P <sup>1)</sup><br>Size | Copy<br>Num. | C <sup>2)</sup><br>Size | Match <sup>3)</sup> | Indels | Score | Percent composition |    |    |    | Entropy<br>(0-2) |
|--------|--------|-------------------------|--------------|-------------------------|---------------------|--------|-------|---------------------|----|----|----|------------------|
|        |        |                         |              |                         |                     |        |       | A                   | C  | G  | T  |                  |
| 5623   | 5654   | 16                      | 2            | 16                      | 93                  | 0      | 55    | 40                  | 18 | 3  | 37 | 1.67             |
| 5766   | 5799   | 17                      | 1.9          | 18                      | 94                  | 5      | 61    | 67                  | 0  | 20 | 11 | 1.21             |
| 5766   | 5799   | 9                       | 3.9          | 9                       | 92                  | 7      | 61    | 67                  | 0  | 20 | 11 | 1.21             |
| 6738   | 7011   | 114                     | 2.4          | 114                     | 87                  | 1      | 368   | 27                  | 22 | 23 | 26 | 2                |
| 8589   | 8635   | 23                      | 2            | 23                      | 100                 | 0      | 94    | 27                  | 12 | 8  | 51 | 1.69             |
| 8624   | 8648   | 13                      | 1.9          | 13                      | 100                 | 0      | 50    | 44                  | 0  | 8  | 48 | 1.32             |
| 28346  | 28551  | 70                      | 2.9          | 70                      | 91                  | 1      | 333   | 26                  | 20 | 16 | 36 | 1.93             |
| 33505  | 33570  | 24                      | 3            | 22                      | 81                  | 12     | 82    | 28                  | 9  | 28 | 33 | 1.88             |
| 35819  | 35858  | 20                      | 2            | 20                      | 90                  | 0      | 62    | 50                  | 2  | 17 | 30 | 1.59             |
| 37948  | 37998  | 21                      | 2.3          | 21                      | 83                  | 10     | 57    | 62                  | 5  | 19 | 11 | 1.49             |
| 38240  | 38271  | 17                      | 1.9          | 16                      | 93                  | 6      | 55    | 25                  | 25 | 6  | 43 | 1.77             |
| 43192  | 43242  | 19                      | 2.7          | 19                      | 72                  | 24     | 54    | 15                  | 17 | 7  | 58 | 1.6              |
| 46542  | 46584  | 22                      | 2            | 21                      | 86                  | 13     | 61    | 30                  | 6  | 11 | 51 | 1.65             |
| 46637  | 46684  | 25                      | 1.9          | 25                      | 100                 | 0      | 96    | 35                  | 8  | 14 | 41 | 1.76             |
| 49989  | 50014  | 13                      | 2            | 13                      | 100                 | 0      | 52    | 46                  | 0  | 15 | 38 | 1.46             |
| 53990  | 54014  | 12                      | 2.1          | 12                      | 100                 | 0      | 50    | 40                  | 0  | 24 | 36 | 1.55             |
| 56325  | 56417  | 20                      | 4.7          | 20                      | 100                 | 0      | 186   | 15                  | 35 | 5  | 44 | 1.69             |
| 60260  | 60285  | 13                      | 2            | 13                      | 100                 | 0      | 52    | 30                  | 23 | 0  | 46 | 1.53             |
| 60341  | 60445  | 21                      | 5            | 21                      | 100                 | 0      | 210   | 61                  | 19 | 9  | 9  | 1.53             |
| 60565  | 60733  | 84                      | 2            | 84                      | 97                  | 0      | 320   | 27                  | 28 | 15 | 28 | 1.96             |
| 60722  | 61207  | 99                      | 4.9          | 100                     | 94                  | 1      | 829   | 29                  | 22 | 8  | 39 | 1.84             |
| 62213  | 62257  | 20                      | 2.2          | 20                      | 96                  | 0      | 81    | 46                  | 4  | 31 | 17 | 1.68             |
| 69322  | 69399  | 39                      | 2            | 39                      | 92                  | 0      | 129   | 24                  | 14 | 24 | 37 | 1.92             |
| 79891  | 79926  | 17                      | 2.1          | 17                      | 89                  | 0      | 54    | 27                  | 19 | 22 | 30 | 1.98             |
| 88293  | 88336  | 21                      | 2.1          | 21                      | 100                 | 0      | 88    | 29                  | 9  | 34 | 27 | 1.87             |
| 94006  | 94037  | 16                      | 2            | 16                      | 100                 | 0      | 64    | 43                  | 18 | 6  | 31 | 1.75             |
| 97726  | 98121  | 81                      | 4.9          | 81                      | 97                  | 0      | 738   | 24                  | 15 | 12 | 46 | 1.81             |
| 98112  | 98161  | 12                      | 3.8          | 12                      | 80                  | 15     | 55    | 6                   | 20 | 0  | 74 | 1.03             |
| 98552  | 98597  | 12                      | 3.8          | 12                      | 75                  | 18     | 51    | 6                   | 19 | 0  | 73 | 1.04             |
| 100732 | 100817 | 21                      | 3.9          | 21                      | 72                  | 14     | 82    | 34                  | 5  | 9  | 50 | 1.59             |
| 101293 | 101467 | 87                      | 2            | 87                      | 100                 | 0      | 350   | 38                  | 18 | 25 | 18 | 1.93             |
| 101452 | 101480 | 15                      | 1.9          | 15                      | 100                 | 0      | 58    | 48                  | 20 | 31 | 0  | 1.5              |
| 102063 | 102126 | 33                      | 1.9          | 33                      | 100                 | 0      | 128   | 39                  | 3  | 28 | 29 | 1.72             |
| 103271 | 103387 | 39                      | 3            | 39                      | 78                  | 2      | 101   | 26                  | 26 | 22 | 24 | 2                |
| 103499 | 103982 | 51                      | 9.5          | 51                      | 81                  | 6      | 383   | 32                  | 16 | 18 | 33 | 1.93             |
| 104529 | 104572 | 12                      | 3.7          | 12                      | 87                  | 0      | 61    | 43                  | 0  | 43 | 13 | 1.44             |
| 104558 | 104608 | 9                       | 5.3          | 9                       | 80                  | 13     | 57    | 37                  | 9  | 41 | 11 | 1.75             |
| 104593 | 104651 | 24                      | 2.5          | 24                      | 97                  | 0      | 109   | 40                  | 5  | 33 | 20 | 1.74             |
| 104695 | 104726 | 12                      | 2.7          | 12                      | 100                 | 0      | 64    | 59                  | 15 | 0  | 25 | 1.36             |
| 104707 | 104780 | 33                      | 2.2          | 33                      | 95                  | 0      | 130   | 52                  | 13 | 13 | 20 | 1.73             |
| 104855 | 104879 | 12                      | 2.1          | 12                      | 100                 | 0      | 50    | 32                  | 44 | 16 | 8  | 1.76             |
| 105919 | 105944 | 12                      | 2.2          | 12                      | 100                 | 0      | 52    | 34                  | 0  | 19 | 46 | 1.5              |

|        |        |    |      |    |     |    |     |    |    |    |    |      |
|--------|--------|----|------|----|-----|----|-----|----|----|----|----|------|
| 114769 | 115101 | 26 | 12.8 | 26 | 88  | 5  | 487 | 26 | 23 | 34 | 15 | 1.94 |
| 116845 | 116940 | 46 | 2.1  | 46 | 100 | 0  | 192 | 47 | 22 | 6  | 22 | 1.73 |
| 118402 | 118521 | 18 | 6.7  | 18 | 95  | 0  | 213 | 56 | 1  | 30 | 10 | 1.43 |
| 121114 | 121163 | 12 | 3.8  | 12 | 80  | 15 | 55  | 6  | 20 | 0  | 74 | 1.03 |
| 121999 | 122044 | 12 | 3.8  | 12 | 75  | 18 | 51  | 6  | 19 | 0  | 73 | 1.04 |
| 123079 | 123134 | 26 | 2.2  | 26 | 83  | 6  | 69  | 35 | 8  | 19 | 35 | 1.83 |
| 124852 | 124979 | 30 | 4.3  | 30 | 100 | 0  | 256 | 57 | 20 | 16 | 6  | 1.61 |
| 125377 | 125521 | 72 | 2    | 72 | 98  | 0  | 281 | 48 | 8  | 26 | 15 | 1.73 |
| 125884 | 125937 | 18 | 3.2  | 18 | 66  | 15 | 51  | 48 | 16 | 18 | 16 | 1.82 |
| 125950 | 126003 | 18 | 3.2  | 18 | 66  | 15 | 51  | 48 | 16 | 18 | 16 | 1.82 |
| 125728 | 126112 | 33 | 11.7 | 33 | 90  | 0  | 592 | 45 | 14 | 22 | 17 | 1.85 |
| 126482 | 126706 | 9  | 25   | 9  | 74  | 17 | 166 | 64 | 0  | 31 | 3  | 1.15 |
| 126482 | 126706 | 69 | 3.1  | 69 | 77  | 9  | 193 | 64 | 0  | 31 | 3  | 1.15 |
| 126483 | 126720 | 27 | 8.5  | 27 | 78  | 14 | 214 | 64 | 0  | 31 | 3  | 1.17 |
| 127408 | 127433 | 9  | 2.9  | 9  | 100 | 0  | 52  | 69 | 11 | 7  | 11 | 1.37 |
| 127556 | 127591 | 18 | 2    | 18 | 100 | 0  | 72  | 55 | 5  | 22 | 16 | 1.62 |
| 129864 | 129934 | 26 | 2.7  | 27 | 97  | 2  | 135 | 25 | 25 | 33 | 15 | 1.95 |
| 130804 | 130916 | 57 | 2    | 57 | 98  | 0  | 217 | 51 | 11 | 15 | 22 | 1.75 |
| 139988 | 140012 | 13 | 1.9  | 13 | 100 | 0  | 50  | 44 | 0  | 24 | 32 | 1.54 |
| 140712 | 140771 | 30 | 2    | 30 | 100 | 0  | 120 | 40 | 13 | 30 | 16 | 1.87 |
| 151963 | 152075 | 57 | 2    | 57 | 98  | 0  | 217 | 22 | 15 | 11 | 51 | 1.75 |
| 152945 | 153015 | 26 | 2.7  | 27 | 95  | 4  | 135 | 15 | 33 | 25 | 25 | 1.95 |
| 155288 | 155323 | 18 | 2    | 18 | 100 | 0  | 72  | 16 | 22 | 5  | 55 | 1.62 |
| 155446 | 155471 | 9  | 2.9  | 9  | 100 | 0  | 52  | 11 | 7  | 11 | 69 | 1.37 |
| 156159 | 156395 | 27 | 8.4  | 27 | 79  | 14 | 203 | 3  | 31 | 0  | 64 | 1.17 |
| 156173 | 156397 | 9  | 25   | 9  | 74  | 17 | 166 | 3  | 31 | 0  | 64 | 1.15 |
| 156219 | 156349 | 69 | 1.9  | 69 | 85  | 3  | 183 | 4  | 31 | 0  | 63 | 1.2  |
| 156767 | 157151 | 33 | 11.7 | 33 | 90  | 0  | 592 | 17 | 22 | 14 | 45 | 1.85 |
| 156876 | 156929 | 18 | 3.2  | 18 | 64  | 15 | 51  | 16 | 18 | 16 | 48 | 1.82 |
| 156942 | 156995 | 18 | 3.2  | 18 | 64  | 15 | 51  | 16 | 18 | 16 | 48 | 1.82 |
| 157358 | 157502 | 72 | 2    | 72 | 98  | 0  | 281 | 15 | 26 | 8  | 48 | 1.73 |
| 157900 | 158027 | 30 | 4.3  | 30 | 100 | 0  | 256 | 6  | 16 | 20 | 57 | 1.61 |
| 160573 | 160605 | 16 | 2.1  | 16 | 88  | 5  | 50  | 21 | 39 | 12 | 27 | 1.88 |
| 160835 | 160880 | 12 | 3.8  | 12 | 75  | 18 | 51  | 73 | 0  | 19 | 6  | 1.04 |
| 161716 | 161765 | 12 | 3.8  | 12 | 78  | 17 | 55  | 74 | 0  | 20 | 6  | 1.03 |
| 164289 | 164348 | 27 | 2.3  | 27 | 80  | 11 | 70  | 0  | 35 | 3  | 61 | 1.12 |
| 164358 | 164477 | 18 | 6.7  | 18 | 95  | 0  | 213 | 10 | 30 | 1  | 56 | 1.43 |
| 165939 | 166034 | 46 | 2.1  | 46 | 100 | 0  | 192 | 22 | 6  | 22 | 47 | 1.73 |
| 167778 | 168110 | 26 | 12.8 | 26 | 88  | 5  | 487 | 15 | 34 | 23 | 26 | 1.94 |

---

\* <sup>1)</sup> P size: Period Size(bp), <sup>2)</sup> C size: Consensus Size(bp), <sup>3)</sup> Match: Percent Matches
